# Supplementary material for: Clinical characteristics and prognosis of pulmonary large cell carcinoma: A population‐based retrospective study using SEER data
Source: PubMed Central journal article supplement (PMC7262949; doi:10.1111/1759-7714.13420), 2020-04-16

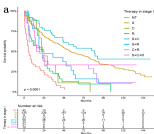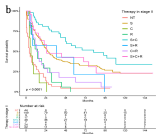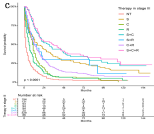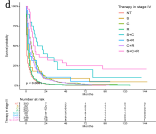

Supplement: TCA-11-1522-s002.pdf [file TCA-11-1522-s002.pdf]
