# Supplementary material for: Clinical characteristics and prognosis of pulmonary large cell carcinoma: A population‐based retrospective study using SEER data
Source: PubMed Central journal article supplement (PMC7262949; doi:10.1111/1759-7714.13420), 2020-04-16
Supplement: TCA-11-1522-s004.pdf [file TCA-11-1522-s004.pdf]

**Supplement table Comparison among different therapy in stage IV**

| Variables              | NT and S      |             |         | C and S+C    |               |         | R and S+R    |               |         |
|------------------------|---------------|-------------|---------|--------------|---------------|---------|--------------|---------------|---------|
|                        | NT<br>(N=393) | S<br>(N=22) | P-value | C<br>(N=201) | C+S<br>(N=20) | P-value | R<br>(N=282) | R+S<br>(N=19) | P-value |
| <b>Age,n(%)</b>        |               |             |         |              |               |         |              |               |         |
| ≤50                    | 24(6.1)       | 2(9.1)      | 0.397   | 16(8.0)      | 4(20.0)       | 0.340   | 19(6.7)      | 1(5.3)        | 0.154   |
| 51-60                  | 60(15.3)      | 2(9.1)      |         | 46(22.9)     | 5(25.0)       |         | 66(23.4)     | 6(31.6)       |         |
| 61-70                  | 105(26.7)     | 4(18.2)     |         | 76(37.8)     | 8(40.0)       |         | 91(32.3)     | 10(52.6)      |         |
| 71-80                  | 123(31.3)     | 11(50.5)    |         | 51(25.4)     | 3(15.0)       |         | 78(27.7)     | 2(10.5)       |         |
| > 80                   | 81(20.6)      | 3(13.6)     |         | 12(6.0)      | 0(0)          |         | 28(9.9)      | 0(0)          |         |
| <b>Sex,n(%)</b>        |               |             |         |              |               |         |              |               |         |
| Female                 | 140(35.6)     | 5(22.7)     | 0.257   | 85(42.3)     | 9(45.0)       | 0.815   | 99(35.1)     | 9(47.4)       | 0.281   |
| Male                   | 253(64.4)     | 17(77.3)    |         | 116(57.7)    | 11(55.0)      |         | 183(64.9)    | 10(52.6)      |         |
| <b>Race,n(%)</b>       |               |             |         |              |               |         |              |               |         |
| White                  | 302(78.6)     | 18(81.8)    | 0.915   | 164(81.6)    | 18(90.0)      | 0.795   | 224(79.4)    | 18(94.7)      | 0.375   |
| Black                  | 71(18.1)      | 3(13.6)     |         | 27(13.4)     | 2(10.0)       |         | 37(13.1)     | 1(5.3)        |         |
| Others                 | 20(5.1)       | 21(5.1)     |         | 10(5.0)      | 0(0)          |         | 21(7.4)      | 0(0)          |         |
| <b>Grade,n(%)</b>      |               |             |         |              |               |         |              |               |         |
| Well/Moderately        | 5(1.3)        | 0(0)        | 1.000   | 0(0)         | 0(0)          | 1.000   | 3(1.1)       | 0(0)          | 1.000   |
| Poorly/Undifferentiate | 388(98.7)     | 33(100)     |         | 201(100)     | 20(100)       |         | 279(98.9)    | 19(100)       |         |
| <b>Primary,n(%)</b>    |               |             |         |              |               |         |              |               |         |
| Upper lobe             | 196(49.9)     | 11(50.0)    | 0.640   | 111(55.2)    | 12(60.0)      | 0.598   | 146(51.8)    | 14(73.7)      | 0.071   |
| Middle lobe            | 19(4.8)       | 1(4.5)      |         | 7(3.5)       | 0(0)          |         | 15(5.3)      | 1(5.3)        |         |
| Lower lobe             | 89(22.6)      | 7(31.8)     |         | 53(26.4)     | 7(35.1)       |         | 62(22.0)     | 4(21.1)       |         |
| Others                 | 89(22.6)      | 3(13.6)     |         | 30(14.9)     | 1(5.0)        |         | 59(20.9)     | 0(0)          |         |

Notes: P-value for Chi-square tests or Fisher's exact tests.

Abbreviations: NT:no therapy; S:surgery; C:chemotherapy; R,radiotherapy
